1 **Activity-dependent production of ATP and ROS in**  
2 **mitochondria of myelinated axons in healthy and**  
3 **neuropathic conditions**

4 **Short title: ATP and ROS production in axonal mitochondria**

5

6 Gerben van Hameren<sup>1\*</sup>, Graham Campbell<sup>1</sup>, Marie Deck<sup>1</sup>, Jade Berthelot<sup>1</sup>, Roman Chrast<sup>2</sup>,  
7 Nicolas Tricaud<sup>1\*</sup>

8 <sup>1</sup> Institut des Neurosciences de Montpellier, INSERM U1051, Université de Montpellier,  
9 Montpellier, France

10 <sup>2</sup> Departments of Neuroscience and Clinical Neuroscience, Karolinska Institutet, Stockholm,  
11 Sweden

12 \* Corresponding authors: gerben.van-hameren@inserm.fr

13 nicolas.tricaud@inserm.fr

14

15 **Author contributions**

16

17 GvH conducted the experiments. GvH and NT designed the experiments and wrote the paper  
18 with contributions from GC and RC. GC, MD and JB contributed to the experiments and to  
19 the design of the experiments. NT supervised the project.

## 20 Abstract

21

22 Mitochondria are critical for the function and the maintenance of myelinated axons notably  
23 through the ATP production. A by-product of this activity is reactive oxygen species (ROS),  
24 which are highly deleterious for neurons. While ROS and metabolism are involved in several  
25 neurodegenerative diseases, it is still unclear how axonal activity or myelin modulates ATP  
26 and ROS production in axonal mitochondria. We imaged and quantified mitochondrial ATP  
27 and hydrogen peroxide ( $H_2O_2$ ) in resting or stimulated peripheral nerve myelinated axons *in*  
28 *vivo*, using genetically-encoded fluorescent probes, two-photon time-lapse and CARS  
29 imaging. ATP and  $H_2O_2$  production is intrinsically higher in nodes of Ranvier even in resting  
30 conditions. Axonal firing increased both ATP and  $H_2O_2$  productions but with different  
31 dynamics. In neuropathic MFN2<sup>R94Q</sup> mice, mimicking Charcot-Marie-Tooth 2A disease,  
32 defective mitochondria failed to upregulate ATP production following axonal activity such as  
33 control mice. However,  $H_2O_2$  production was dramatically sustained. Moreover, mimicking  
34 demyelinating peripheral neuropathy resulted in a reduced production of ATP while  $H_2O_2$   
35 level soared. Taken together, our results suggest that ATP and ROS productions are  
36 decoupled under neuropathic conditions, which may compromise axonal function and  
37 integrity.

38

39 **Keywords:** Axons, axonal activity, mitochondria, ATP, ROS, PNS, demyelination, MFN2.

40

## 41 1. Introduction

42

43 While the nervous system, and the brain in particular, represents around 2% of the body mass,  
44 it consumes up to 20% of the glucose we mobilize every day [1]. This high energy

45 expenditure in the nervous system is firstly due to the synaptic activity that requires high  
46 amounts of adenosine tri-phosphate (ATP) [1]. A second energy demanding process is the  
47 propagation of action potentials (APs) along axons. Indeed, conduction of APs involves ion  
48 exchanges through the plasma membrane, first through voltage-gated ion channels to  
49 depolarize, then through the sodium-potassium ATPase to repolarize [2,3]. Therefore, the  
50 production of ATP in axons is crucial for repeated regeneration of APs. Both in the central  
51 nervous system (CNS) and in the peripheral nervous system (PNS), myelination significantly  
52 reduces the energy cost of AP propagation through the sequestration of the AP firing  
53 machinery at the node of Ranvier and axon initial segment [4].

54

55 Mitochondria appear to be the main source of cellular ATP and these organelles are abundant  
56 in CNS [5,6] and PNS [7] axons. Some reports indicated that mitochondria were more  
57 abundant in the node of Ranvier [8]. In addition, axonal AP activity and axo-glia junctions  
58 regulates the recruitment of mitochondria in the nodal area [9]. Therefore, a well-accepted  
59 idea is that axonal AP activity could locally stimulate ATP production in axonal mitochondria  
60 [10]. However, this nodal enrichment in mitochondria remains controversial [11] and the  
61 dynamic of local mitochondrial ATP production following AP is actually unknown.

62

63 As an intrinsic by-product of ATP production, mitochondria also produce reactive oxygen  
64 species (ROS) [12,13]. The mitochondrial electron transport chain (ETC) and NADPH  
65 oxidases are the major sources of superoxide ( $O_2^{\bullet-}$ ), a highly reactive type of ROS, within  
66 cells [14].  $O_2^{\bullet-}$  is rapidly converted to  $H_2O_2$  by superoxide dismutase (SOD) and  $H_2O_2$  is then  
67 reduced to  $H_2O$  and  $O_2$  by mitochondrial glutathione peroxidase (GPx) and cytosolic enzymes  
68 [15].  $H_2O_2$  can also react with iron or  $O_2^{\bullet-}$  to form hydroxyl radicals ( $OH^{\bullet}$ ), which is then  
69 reduced by molecular hydrogen to  $H_2O$  [16]. If not reduced by antioxidants, all types of ROS

70 are highly toxic for the cell and in particular for mitochondria, where they are produced.

71 Indeed ROS can directly oxidize and damage DNA, carbohydrates, proteins or lipids [17].

72

73 In several neurodegenerative diseases and axonopathies, such as Parkinson's disease [18],

74 multiple sclerosis (MS) [19] and Charcot-Marie-Tooth diseases (CMT) [20], mitochondrial

75 dysfunction and increased levels of ROS have been shown to be involved. Whether axonal

76 mitochondria are involved is still unclear and investigating the production of ATP and ROS

77 by these mitochondria in active or diseased axons in real time *in vivo* would constitute a first

78 answer.

79

80 The importance of mitochondrial homeostasis for the normal function of myelinated axons

81 [9,21] is highlighted by mutations in the *mitofusin 2 (MFN2)* gene. Indeed, MFN2 has several

82 functions in mitochondria physiology, among which mitochondrial fusion [22] and transport

83 along axons [23], and mutations in its gene result in axonal form of peripheral neuropathy

84 (CMT2A) in humans and in mice [24,25]. In particular, MFN2 loss-of-function in axonal

85 mitochondria decreases the expression of oxidative phosphorylation subunits [26], suggesting

86 that *MFN2* mutations also affect ATP and ROS production. However, this remains to be

87 shown *in vivo*.

88

89 MS is a chronic inflammatory disease affecting myelinated tracts in the brain [27]. MS is

90 characterized by demyelinated lesions resulting from the loss of the myelin sheath and the

91 progressive form of MS shows successive events of myelin degeneration and regeneration

92 that damage axons [27]. A common hypothesis is that demyelinated axons are more

93 demanding in ATP in order to maintain their functions and their integrity [28]. Recent data

94 showed that axonal mitochondria complex IV activity is increased in MS lesions and the total

95 mitochondrial mass is increased [29], suggesting that axonal mitochondria are indeed  
96 producing more ATP. In addition, while activated microglia and macrophages are thought to  
97 be the initial source of ROS, axonal mitochondria dysfunction and an increase of  
98 mitochondrial ROS contribute to progressive MS [30]. Taken together this suggests that the  
99 myelin sheath plays a significant role in the maintenance of axonal mitochondria homeostasis  
100 and in particular in the production of ATP and ROS in mitochondria.

101

102 To answer these questions, we set up an *in vivo* approach using a H<sub>2</sub>O<sub>2</sub>-sensitive GFP  
103 (roGFP-Orp1) [31] and a fluorescent ATP sensor (AT1.03) [32] targeted to mitochondria to  
104 image and measure the dynamics of ATP and H<sub>2</sub>O<sub>2</sub> production in mitochondria of myelinated  
105 axons in myelinated axons of the PNS. Using this approach, we show that both ATP and H<sub>2</sub>O<sub>2</sub>  
106 levels are increased in mitochondria residing in nodes of Ranvier and that nerve stimulation  
107 sharply increases ATP and H<sub>2</sub>O<sub>2</sub> production by mitochondria in few minutes. While MFN2  
108 mutations had no effect on basal levels of ATP and H<sub>2</sub>O<sub>2</sub> in axons, it prevented the increase of  
109 ATP production after nerve stimulation. At the opposite, an increased H<sub>2</sub>O<sub>2</sub> production was  
110 observed. Moreover, pathological demyelination reduced ATP production while enhancing  
111 mitochondrial ROS, showing that both neuropathic conditions decoupled the production of  
112 ATP from the production of ROS.

113

## 114 **2. Results**

### 115 *2.1. Validation of the mito-roGFP-Orp1 and mito-AT1.03 probes*

116

117 We used AT1.03, which is a genetically-encoded fluorescence probe based on fluorescence  
118 resonance energy transfer (FRET), to detects ATP [32]. This probe consists of the cyan  
119 fluorescent protein (CFP) mseCFP, the yellow fluorescent protein (YFP) variant monomeric

120 Venus, both linked at the  $\epsilon$ -subunit of the *Bacillus subtilis* FoF1-ATP synthase. In the  
121 presence of ATP, the  $\epsilon$ -subunit retracts to bring the two fluorescent proteins close to each  
122 other, thereby increasing FRET efficiency. The conformational change is reversible. Relative  
123 ATP levels are measured using the YFP/CFP fluorescence ratio.

124 Redox sensitive GFPs (roGFPs) harbor an engineered dithiol/disulfide switch on their  
125 surface, which determines their wavelength of excitation [33]. RoGFP2 has been converted  
126 into an H<sub>2</sub>O<sub>2</sub> specific probes by fusion with the microbial H<sub>2</sub>O<sub>2</sub> sensor Oxidant Receptor  
127 Peroxidase 1 (Orp1) [31]. The reaction is reversible via reduction by cellular thioredoxin  
128 (Trx) or GRx/GSH [34]. Relative H<sub>2</sub>O<sub>2</sub> levels are measured using the ratio of emitted  
129 fluorescence lights when excited at 800nm (oxidized form) or 940nm (reduced form). All  
130 experiments were done in the same imaging conditions and analysis. As both probes are  
131 ratiometric, the measured values are independent of the number of mitochondria or of the  
132 absolute fluorescence intensity of the probe. Both probes were targeted to the mitochondrial  
133 matrix.

134

135 We first validated mito-roGFP-Orp1 and mito-AT1.03 probes *in vivo*. Injection of AAV9-  
136 mito-roGFP-Orp1 and AAV9-mito-AT1.03 in the spinal cord of mouse pups one day after  
137 birth (P1) resulted in expression of the fluorescent probes in multiple axons that are part of  
138 sciatic and saphenous nerves (Fig 1A). Coherent Anti-stokes Raman Scattering (CARS)  
139 microscopy uses the non-linear interactions between light and molecules to generate light  
140 from lipids without labeling [35]. As myelin is enriched with lipids, CARS microscopy allows  
141 visualizing the myelin sheath around axons *in vivo* [36,37,38]. Using this technique, we  
142 observed that the fluorescent probe signal was encompassed by the myelin sheath, which  
143 shows the probes are expressed in myelinated axons (Fig 1A). We then performed an  
144 immunostaining of teased fibers for the mitochondrial marker TOM20 and observed a partial

145 colocalisation between fluorescent probes and mitochondria (Fig 1B), showing probes are  
146 expressed in axonal mitochondria, but not all of them. Consistently, mitochondria located in  
147 Schwann cells surrounding axons were labeled with TOM20 antibody but not with fluorescent  
148 probes. Both probes could be detected in axons of the mouse saphenous and sciatic nerves *in*  
149 *vivo*.

150 Then the ratio of the fluorescent intensity of oxidized/reduced roGFP-Orp1 (R) was  
151 followed over time (Fig 1C), showing a small and slow increase of the ratio ( $0.206 \pm 0.002$   
152 per hour) probably due to air oxidation. Addition of reducer DTT on the nerve resulted in a  
153 significant decrease of the fluorescence ratio, while injection of oxidizer diamide resulted in a  
154 significant increase of fluorescence ratio (Fig 1D). These results show that the  
155 dithiol/disulfide switch of mito-roGFP-Orp1 is an efficient and reliable indicator of relative  
156 redox changes in axonal mitochondria of mouse peripheral nerves *in vivo*. The fluorescence  
157 ratio YFP/CFP of mito-AT1.03 (R) was very stable over time (Fig 1E). Injection of 0.4M and  
158 1M ATP into the sciatic nerve in an increase of AT1.03 fluorescence ratio (Fig 1F), showing  
159 this probe is also functional *in vivo*.

## Figure 1

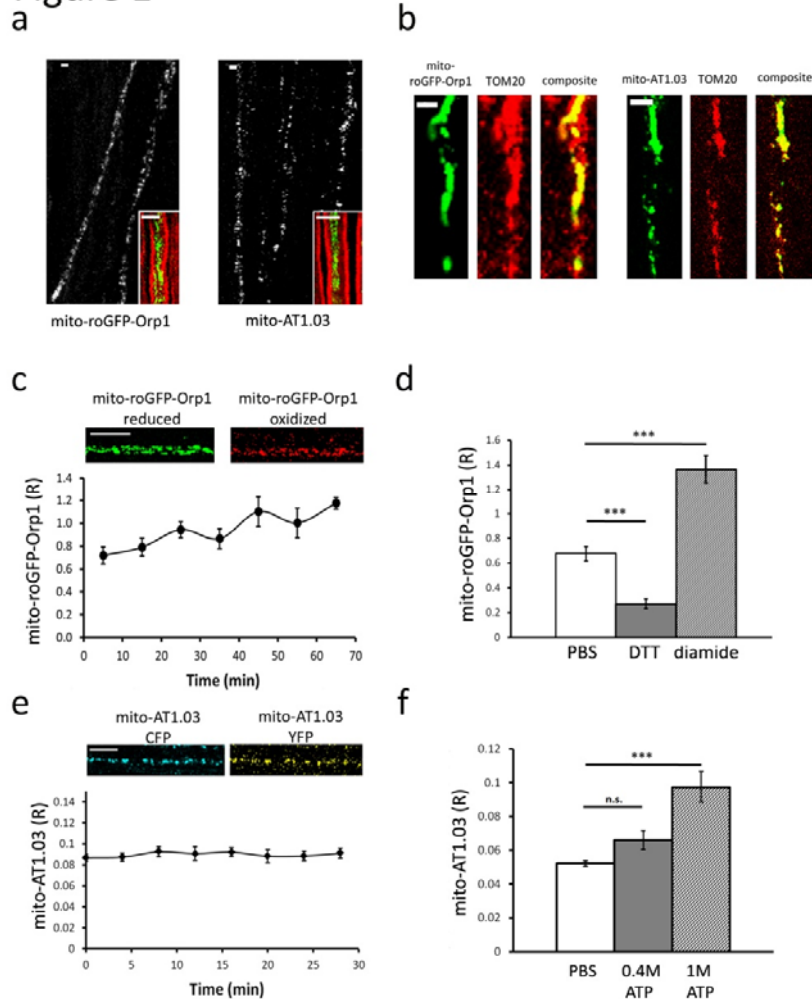

160

### Figure 1: *In vivo* validation of the fluorescent probes.

(A) Several axons expressing mito-roGFP-Orp1 or mito-AT1.03 probe can be observed in teased fibers of mouse sciatic nerve 1 month after the virus injection. CARS imaging (inserts) shows that axons expressing mito-roGFP-Orp1 or mito-AT1.03 (green) are surrounded by a myelin sheath (red). Scale bars = 3  $\mu$ m. (B) mito-roGFP-Orp1 expression (green) partially colocalizes with mitochondrial marker TOM20 (red) in the axon. Similarly, mito-AT1.03 partially colocalizes with TOM20 in axonal mitochondria. Scale bars = 3  $\mu$ m. (C) A fluorescent signal of mito-roGFP-Orp1 is detected when the probe is reduced and when it is oxidized by H<sub>2</sub>O<sub>2</sub>. The ratio of mito-roGFP-Orp1 fluorescence measured *in vivo* (n=6 axons; 6 mice) shows a slight increase over time. Scale bar = 10  $\mu$ m (D) Mito-roGFP-Orp1 fluorescence ratio decreases with DTT (p=0.006; n=3 axons, 3 mice) and increases after injection of diamide into the nerve (p=0.003; n=4 axons, 4 mice). (E) A fluorescent signal of the CFP subunit and YFP subunit of mito-AT1.03 is detected. Mito-AT1.03 fluorescence ratio measured *in vivo* shows no significant change over time (n=18 axons; 3 mice). Scale bar = 10  $\mu$ m. (F) Mito-AT1.03 fluorescence ratio increases after injection of 0.4M (p=0.06; n=3 axons, 3 mice) and 1M (p<0.001; n=6 axons, 4 mice) ATP into the sciatic nerve. All error bars show SEM. Statistical analysis shows Student two-tailed T-tests.

161



162 2.2 The effect of nerve stimulation on ATP and  $H_2O_2$  production

163

164 While ATP is supposed to be critical for the firing of axons, ATP production in mitochondria  
165 of functionally active axons has never been observed *in vivo*. We used the real-time imaging  
166 approach previously described in combination with a setup for electrical nerve stimulation  
167 based on previous work [39] (Fig 2A-D). We used the saphenous nerve, which is mostly  
168 composed of sensory axons, hence its stimulation leads to only limited unwanted contraction  
169 of the paw's muscles [40]. After recording the probe fluorescence for at least 20 minutes  
170 without stimulation, APs were induced by an electrical burst stimulation protocol including 3  
171 bursts of 50Hz for 30 seconds spaced by a 60 second recovery period (Fig 2E).

Figure 2

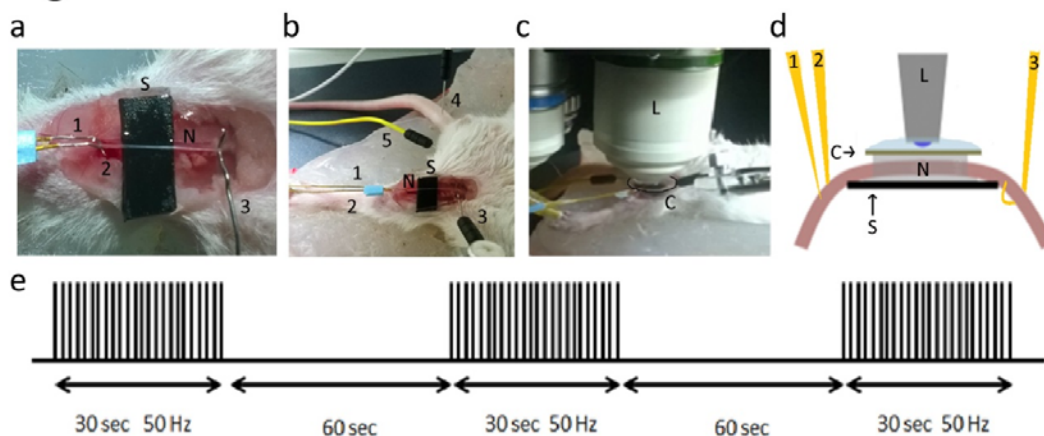

**Figure 2: Setup of the saphenous nerve imaging experiment.**

(A) After deep anesthesia, the mouse is placed on its back, the skin of its left inner thigh is removed and the saphenous nerve (N) is placed on a plastic strip (S). Two stimulation microelectrodes (1 and 2) are inserted on both sides of the nerve on the plastic strip and one hook-shaped recording electrode (3) is holding the nerve on the opposite side. (B) The ground electrode (4) is inserted in the mouse tail and the negative electrode (5) in the groin area. (C) A glass coverslip (Co) is then placed on the nerve soaked in PBS and the mouse is then placed under the two-photon microscope immersion lens 20X (L) in water. (D) Schematic view of the imaging setup. (E) Schematic representation of the nerve stimulation pattern used to induce APs. The generation of APs was verified using the recording electrode. Negative electrode was used to correct for background signal.

173

174

175 The fluorescent signal of mito-AT1.03 was recorded every 5 minutes for 20 minutes after  
176 stimulation (Fig 3A). At each time point the fluorescence ratio (R) was corrected for the mean  
177 fluorescence ratio of that same axon before nerve stimulation (R0). After a first stimulation,  
178 the fluorescence ratio of mito-AT1.03 increased in several axons, but not in all of them  
179 (44%), resulting in a slight non-significant average increase (Fig 3a). After the second  
180 stimulation, all axons responded significantly increasing mitochondrial ATP production (Fig  
181 3a). In the same conditions, nerve stimulations significantly increased mitochondrial H<sub>2</sub>O<sub>2</sub>  
182 production just 1 minute after the stimulation period (Fig 3B). H<sub>2</sub>O<sub>2</sub> level then quickly went  
183 back and stabilized at pre-stimulation values (Fig 3B). These data show that axonal  
184 mitochondria very quickly adapt to the axonal activity up-regulating their production of ATP.  
185 Spikes in mitochondrial H<sub>2</sub>O<sub>2</sub> production were also observed just before the surge of ATP in  
186 mitochondria (Fig 3C), suggesting that this H<sub>2</sub>O<sub>2</sub> production reflects the oxidative  
187 phosphorylation process.

### Figure 3

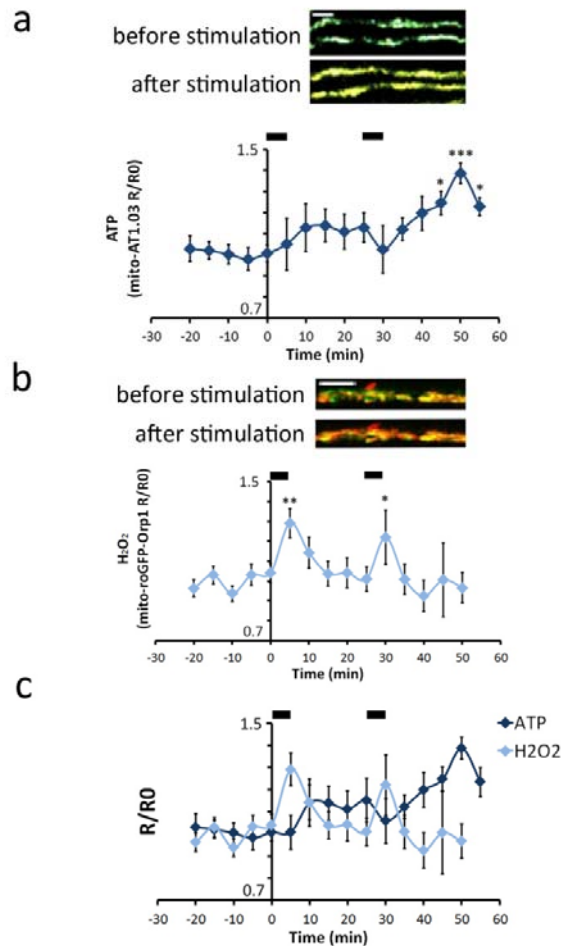

188

**Figure 3: Effect of burst nerve stimulation on mitochondrial ATP and H<sub>2</sub>O<sub>2</sub> levels.**

(A) Upper panels: Nerve stimulation induced changes in the fluorescence signal of both the CFP and YFP subunit of mito-AT1.03 as illustrated by the YFP/CFP overlay pictures. Lower panel: graph showing mito-AT1.03 fluorescence ratio normalized to pre-stimulation values (R/R<sub>0</sub>) following two successive nerve stimulation period (black bars at the top). The first stimulation results in a slight, non-significant increase; a significant increase is measured after a second stimulation (p=0.0171 at t=45, p=0.0001 at t=50, p=0.049 at t=55; F-value = 2.872; Df=15; n=9 axons in 3 mice). (B) Upper panels: Nerve stimulation induced changes in the fluorescence signal of both the oxidized and reduced forms of GFP in mito-roGFP-Orp1 as illustrated by the overlay pictures. Lower panel: graph showing mito-roGFP-Orp1 fluorescence ratio normalized on pre-stimulation values (R/R<sub>0</sub>) following two successive nerve stimulation (black bars at the top). Both stimulations result in a significant increase 5 minutes after the stimulation (p=0.007; p=0.04; F-value = 2.804; Df=14; n=14 axons in 7 mice). (C) Graphs described in a and b were overlaid to show the relative dynamics of ATP and ROS levels after nerve stimulations. Scale bars= 5  $\mu$ m. Error bars show SEM. Statistical tests are one-way ANOVA.

189

190 *2.3. ATP and H<sub>2</sub>O<sub>2</sub> production are altered in CMT2A neuropathic mice*

191

192 We recently showed that MFN2<sup>R94Q</sup> mice, a model for CMT2A disease [25] where MFN2 is  
193 defective, displayed altered mitochondria motility and clustering in peripheral nerve axons  
194 [41]. We used this model to measure the level of ATP in axonal mitochondria of myelinated  
195 axons in neuropathic conditions. In non-stimulated conditions, control and mutant mice  
196 axonal mitochondrial ATP production were similar (Fig 4A). After the first stimulation,  
197 similar to control mice, mitochondrial ATP production increased in some axons whereas  
198 others did not respond, resulting in statistically non-significant variation (Fig 4B). However,  
199 after a second period of nerve stimulation, as opposed to controls, MFN2<sup>R94Q</sup> axonal  
200 mitochondria failed to upregulate ATP production (Fig 4B-C). This indicates that  
201 dysfunctional MFN2 does not hinder the basal production of ATP by axonal mitochondria but  
202 impairs their ability to up-regulate their production in response to axonal activity.

203         Similar to ATP, we found no difference between controls and MFN2<sup>R94Q</sup> mice in the  
204 basal H<sub>2</sub>O<sub>2</sub> levels (Fig 4D). When nerves were stimulated, mitochondrial H<sub>2</sub>O<sub>2</sub> significantly  
205 increased after each stimulation period (Fig 4E). However, this increase was delayed  
206 compared to controls and H<sub>2</sub>O<sub>2</sub> levels remained high for longer time (Fig 4F), showing that  
207 axonal mitochondria produce more deleterious H<sub>2</sub>O<sub>2</sub> than control mice in response to axonal  
208 activity. Since ROS production in the mitochondrial matrix reflects the oxidative  
209 phosphorylation process [42,43], these data indicate that oxidative phosphorylation is  
210 decoupled from ATP production in mitochondria of these neuropathic mice.

## Figure 4

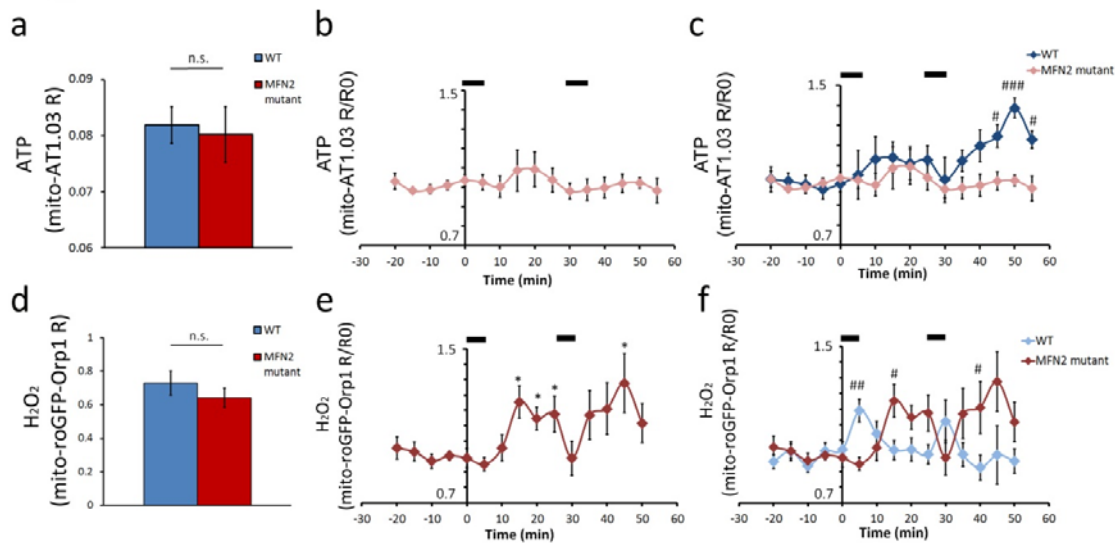

211

**Figure 4: ATP and H<sub>2</sub>O<sub>2</sub> levels of MFN2<sup>R94Q</sup> mice.**

(A) Graph showing mito-AT1.03 fluorescence ratio in resting axonal mitochondria of wild-type or mutant MFN2<sup>R94Q</sup> mice (Student two tailed T-test  $p=0.809$ ;  $n=18$  axons, 7 mice per group). (B) Graph showing mito-AT1.03 fluorescence ratio normalized on pre-stimulation values (R/R0) following two successive nerve stimulation periods (black bars at the top). The first period of stimulation resulted in a slight, non-significant increase; the second stimulation period did not generate any change ( $n=14$  axons in 5 mice). (C) Graphs showing mito-AT1.03 R/R0 in wild-type (Fig. 3A) and mutant MFN2<sup>R94Q</sup> mice (B panel) were overlaid to show the relative dynamics of ATP levels in both genotypes after nerve stimulations (Two way ANOVA,  $p=0.011$  at  $t=45$ ,  $p<0.001$  at  $t=50$ ,  $p=0.02$  at  $t=55$ ,  $F\text{-value}=19,27$ ;  $Df=1$ ). (D) Graph showing mito-roGFP-Orp1 fluorescence ratio in resting axonal mitochondria of wild-type or mutant MFN2<sup>R94Q</sup> mice (Student two tailed T-test  $p=0.337$ ;  $n=16$  axons, 8 mice per group). (E) Graph showing mito-roGFP-Orp1 fluorescence ratio normalized on pre-stimulation values (R/R0) following two successive nerve stimulation periods (black bars at the top). Both stimulations result in a significant increase ( $p=0.013$  at  $t=15$ ,  $p=0.020$  at  $t=20$ ,  $p=0.044$  at  $t=25$  and  $p=0.038$  at  $t=45$ ;  $F\text{-value}=3.095$ ;  $Df=14$ ;  $n=11$  axons in 4 mice). (F) Graphs showing mito-roGFP-Orp1 R/R0 in wild-type (Fig. 3B) and mutant MFN2<sup>R94Q</sup> mice (E panel) were overlaid to show the relative dynamics of H<sub>2</sub>O<sub>2</sub> levels in both genotypes after nerve stimulations. A significant higher H<sub>2</sub>O<sub>2</sub> level is detected in wild-type first (Two way ANOVA,  $p=0.007$  at  $t=5$ ,  $F\text{-value}=5,484$ ;  $Df=1$ ), then a higher H<sub>2</sub>O<sub>2</sub> level is detected in mutant MFN2<sup>R94Q</sup> ( $p=0.014$  at  $t=15$ ,  $p=0.047$  at  $t=40$ ). Error bars show SEM. # =  $p\text{-value}<0.05$ . ## =  $p\text{-value}<0.01$ . ### =  $p\text{-value}<0.001$ .

212

213

214 2.4. ATP and H<sub>2</sub>O<sub>2</sub> production in nodes of Ranvier and internodes

215

216 The enrichment of mitochondria at the node of Ranvier and whether these nodal mitochondria  
217 are more metabolically active remains controversial. In order to detect potential spatial  
218 differences between nodal and internodal mitochondria, we used CARS microscopy. Gaps in  
219 CARS signal between two myelinated internodes are nodes of Ranvier (Fig 5A) [38,43,44].  
220 Combining two-photon imaging of fluorescent probes with CARS imaging allowed us to  
221 analyze mitochondrial physiology in nodes of Ranvier versus internodes defined as areas  
222 distant of more than 5  $\mu\text{m}$  from the node (Fig 5A). In all observed nodes of Ranvier, probes-  
223 labeled mitochondria were present, but they were not more abundant or larger than in  
224 internodes (Fig 5A). However, when measuring the mito-AT1.03 and mito-roGFP-Orp1  
225 fluorescence ratio, we found significantly higher ATP and  $\text{H}_2\text{O}_2$  levels in node of Ranvier  
226 mitochondria (Fig 5B-C). These data, obtained in resting animal without nerve stimulations,  
227 indicate that nodal mitochondria are intrinsically more metabolically active than internodal  
228 ones. In neuropathic MFN2<sup>R94Q</sup> mice, nodal mitochondria did not show a higher level of ATP  
229 versus internodal mitochondria (Fig 5B). However, they still had higher level of  $\text{H}_2\text{O}_2$  (Fig  
230 5C), suggesting again a decoupling between oxidative phosphorylation and the production of  
231 ATP in mitochondria of these mutant mice.

Figure 5

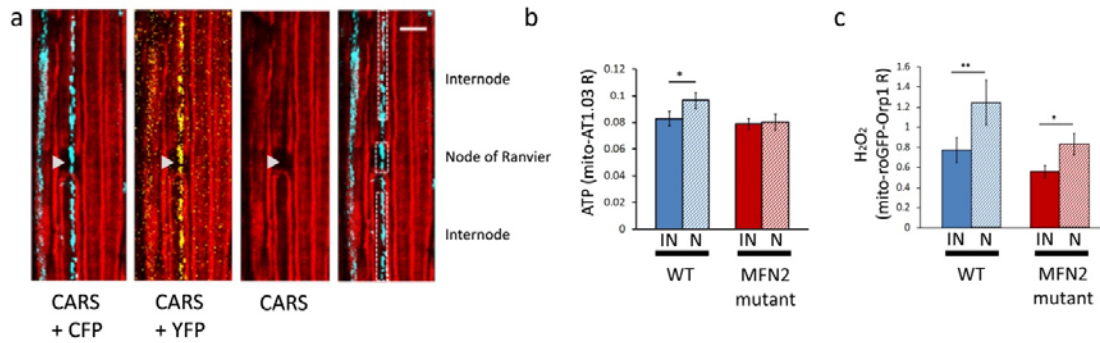

232

**Figure 5: ATP and H<sub>2</sub>O<sub>2</sub> levels are different along axons.**

(A) Two-photon imaging of CFP (blue) and YFP (yellow) fluorescence of mito-AT1.03 was combined with CARS imaging of the myelin sheath (red). CARS imaging gap shows a node of Ranvier (arrowhead). Using the combined images, mitochondria located in the node of Ranvier and mitochondria located in internodes can be identified (right panel). Scale bar = 10  $\mu$ m (B) Graph showing mito-AT1.03 fluorescence ratio in axonal mitochondria located in nodes of Ranvier (N) or internodes (IN) of wild-type (WT) or MFN2<sup>R94Q</sup> mice (MFN2 mutant). In wild-type mice, ATP levels are higher in mitochondria in nodes of Ranvier than in internodes (p=0.035; n=14 axons in 7 mice). In MFN2<sup>R94Q</sup> mice, ATP levels in node of Ranvier mitochondria are equal to internode mitochondria (n=7 nodes in 3 mice). (C) Graph showing mito-roGFP-Orp1 fluorescence ratio in axonal mitochondria located in nodes of Ranvier or internodes of wild-type or mutant MFN2<sup>R94Q</sup> mice. In both wild-type mice and mutant MFN2<sup>R94Q</sup> mice, H<sub>2</sub>O<sub>2</sub> levels are higher in mitochondria in nodes of Ranvier than in internodes (WT: p=0.009; n=8 axons in 3 mice. MFN2<sup>R94Q</sup>: p=0.019; n=9 axons in 3 mice). Error bars show SEM. Statistical tests are Paired T-tests.

233

### 234 2.5. ATP and H<sub>2</sub>O<sub>2</sub> production in mitochondria of demyelinated axons

235

236 The myelin sheath is critical to maintain the node of Ranvier on myelinated axons and is  
237 therefore likely to play a significant role in the homeostasis of axonal mitochondria. As  
238 demonstrated in Fig 5a, the myelination state of the axons in the mouse sciatic nerve can be  
239 assessed *in vivo* by CARS imaging. We therefore investigated how this demyelination affects  
240 axonal mitochondria physiology *in vivo*. To induce demyelination we used lyso-  
241 phosphatidylcholine (LPC) and we followed the production of mitochondrial ATP and H<sub>2</sub>O<sub>2</sub>  
242 in axons during demyelination and during the restoration of the myelin sheath

243 (remyelination). LPC, which is a signaling molecule resulting from the hydrolysis of  
244 phosphatidylcholine by phospholipase A2 [45] acts in mSC and oligodendrocytes as a  
245 demyelinating signal [46,47,48]. LPC was injected in the sciatic nerve of adult mice and  
246 demyelination occurred immediately to culminate one week after the injection with the  
247 formation of myelin ovoids and debris as seen using CARS (Fig 6A, week 1) [37,49]. As soon  
248 as two weeks after LPC injection, remyelination occurred and some thin myelin sheaths  
249 reappeared around axons (Fig 6A, week 2). Axons were completely remyelinated three weeks  
250 after injection of LPC (Fig 6a, week 3). No demyelination occurred in control mice injected  
251 with PBS (Fig 6A last panel). Axonal integrity is not directly affected by LPC (S1 Figure)  
252 [50] and axonal mitochondria remained visible using either mito-AT1.03 or mito-roGFP-Orp1  
253 probes during the entire process of demyelination and remyelination (Fig 6A inserts).

254

Figure 6

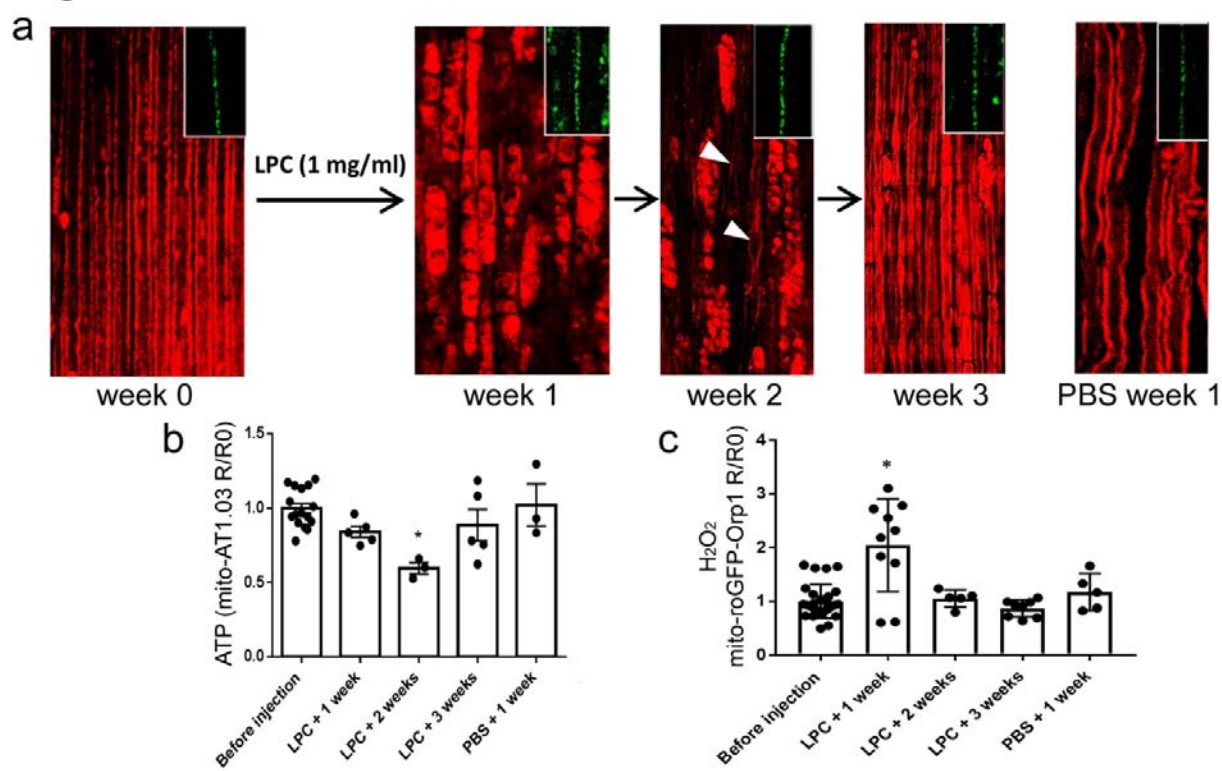

255



**Figure 6: Impact of demyelination on axonal mitochondria ATP and H<sub>2</sub>O<sub>2</sub>.**

(A) CARS imaging is used to visualize myelin. At week 0, before injection of LPC, most axons are myelinated. 1 week after LPC injection, axons are demyelinated and myelin debris and ovoids are observed. At week 2, thinly myelinated axons are observed in between the myelin debris (arrowheads) and at week 3, almost all axons are myelinated again, thus resembling a healthy nerve. PBS injection induces small conformational changes, but no formation of ovoids or debris. Inserts show that neuronal mitochondria remain visible throughout the whole process. (B) Graph showing mito-AT1.03 fluorescence ratio (R) in axonal mitochondria normalized on pre-demyelination values (R<sub>0</sub>) following demyelination. Following LPC injection, ATP levels are unchanged after 1 week (p=0.085; n=5 mice; 27 axons), decreased after 2 weeks (p=0.019; n=3 mice, 24 axons) and restored after 3 weeks (p=0.491; n=5 mice; 31 axons). PBS injection results in no significant change (p=0.799; n=3 mice; 23 axons). (C) Graph showing mito-roGFP-Orp1 fluorescence ratio (R) in axonal mitochondria normalized on pre-demyelination values (R<sub>0</sub>) following demyelination. Following LPC injection, H<sub>2</sub>O<sub>2</sub> levels are increased after 1 week (p=0.031; n=10 mice, 17 axons), and unchanged after 2 weeks (p=0.663; n=5 mice, 9 axons) and after 3 weeks (p=0.450; n=8 mice, 13 axons). PBS injection results in no significant change (p=0.121; n=3 mice, 5 axons).

256

257 We therefore measured the fluorescence ratio for these probes in non-stimulated axonal  
258 mitochondria during the process. One week after LPC injection, when axons are completely  
259 demyelinated, ATP production was slightly lower than before demyelination, but not  
260 significantly (Fig 6B), while H<sub>2</sub>O<sub>2</sub> levels peaked (Fig 6C). ATP levels were significantly  
261 lower in axonal mitochondria at two weeks after LPC injection, while H<sub>2</sub>O<sub>2</sub> levels were back  
262 to control and pre-demyelination levels (Fig 6B-C). Finally, three weeks after injection, when  
263 remyelination is completed, ATP levels were back to control and pre-demyelination levels as  
264 are the H<sub>2</sub>O<sub>2</sub> levels (Fig 6B-C). No change either in ATP or H<sub>2</sub>O<sub>2</sub> levels were detected at one  
265 week after injection with PBS in control mice (Fig 6B-C). Moreover, increase in ROS did not  
266 result from a general oxidative stress in the demyelinated nerve, since CellRox dye did not  
267 show any significant increase, except at the LPC injection site where we did not image our  
268 probe (S1 Fig). Taken together, these data indicate that the myelin sheath has a profound  
269 impact on axonal mitochondria physiology. Mitochondria manage to maintain their ATP  
270 production during myelin break-down, but they generate more H<sub>2</sub>O<sub>2</sub>. The process of

271 remyelination leads to decreased production of ROS, while ATP production is temporally  
272 diminished before full remyelination. These data therefore indicate that demyelination induces  
273 the decoupling of ATP production from oxidative phosphorylation.

274

### 275 **3. Discussion**

276

277 Although it has been shown that PNS axonal mitochondria, like most mitochondria, produce  
278 both ATP and ROS, the regulations of their production are still not well understood *in vivo*  
279 and *in situ*. We used a combination of viral delivery of mitochondria-targeted fluorescent  
280 probes to active peripheral neurons and two-photon and CARS live imaging in mice to fill  
281 that gap. The mito-AT1.03 and mito-roGFP-Orp1 fluorescent probes had been previously  
282 validated *in vitro* [51] and *in vivo* [33] in other systems but we also validated them *in vivo* in  
283 our system. We did not attempt to measure absolute values of ATP or H<sub>2</sub>O<sub>2</sub> with each probe  
284 fluorescence *in vivo* because firstly, this was difficult as probes are targeted to mitochondrial  
285 matrix and secondly, it was not necessary as we aimed to compare different genotypes and  
286 conditions in particular with time. So only relative values obtained in the same imaging  
287 conditions are shown here. We found that the range of detection was large enough to cover  
288 the changes occurring in axonal mitochondria *in vivo*. Moreover the probe sensitivity was  
289 sufficient to observe variations in real-time using a 5 minutes delay between measures. This  
290 delay was partly imposed by relative low speed of our imaging system (1 minute to create 10  
291 scans of 200µm<sup>2</sup> over 40 µm depth for each wavelength), but also by the intrinsic limits of our  
292 set-up: electrical stimulation induced slight contractions of saphenous nerve surrounding  
293 muscles which made the pictures blurred during the stimulation. The probes alterations were  
294 also reversible fast enough to observe changes in both directions. Mito-AT1.03 was stable,  
295 but mito-roGFP-Orp1 showed a slight increase of its fluorescence ratio over time under our

296 experimental settings. These results are not explained by photobleaching or degradation of the  
297 probe, since the total fluorescent signal does not decrease. This change in ratio of  
298 fluorescence may be caused by air oxidation [52]. However, buffered artificial cerebrospinal  
299 fluid as an incubation medium for the saphenous nerve did not prevent the probe oxidation.  
300 Nonetheless, this slow oxidation of mito-roGFP-Orp1 had negligible effects on our  
301 experiments, since it was too slow to cause significant changes in our relatively short term  
302 imaging.

303

304 Axonal activity induced stereotypic changes in ATP and H<sub>2</sub>O<sub>2</sub> production by axonal  
305 mitochondria. Shortly after the stimulation, H<sub>2</sub>O<sub>2</sub> production increased and dropped  
306 immediately and then ATP increased for several minutes. This was stereotypic, because it  
307 occurred almost identically after both stimulations we did. After the first stimulation, not all  
308 axonal mitochondria produced more ATP, suggesting that either our stimulation protocol was  
309 not mobilizing enough axons or axonal mitochondria are deactivated, similar to some ion  
310 channels. This limitation was lifted by the second stimulation. On the attempts we did for  
311 further stimulations, sometimes the ATP level was maintained at high range and sometimes  
312 mitochondria did not respond anymore. The reason for these variations in the long term is  
313 unknown and we did not pursue this further. However, taken together, this suggests that ATP  
314 production in axonal mitochondria is positively correlated with the level of axonal activity  
315 and can eventually reach a plateau in our conditions. Due to technical reasons we could not  
316 measure H<sub>2</sub>O<sub>2</sub> levels in mitochondria after several stimulations. However, looking at the first  
317 two stimulations, we conclude that H<sub>2</sub>O<sub>2</sub> production in mitochondria is also positively  
318 correlated with axonal activity but not cumulative. It would be interesting to look further for  
319 the molecular mechanisms that allow mitochondria to detect axolemma depolarization or ion  
320 channels activity on a very short period of time (around one minute in our detection

321 capacities). This fast kinetic suggests the role of ions, such as calcium ions, which are  
322 mobilized during AP firing at the node of Ranvier [53], or kinases. A mechanism involving  
323 calcium has been shown to anchor mitochondria at the node of Ranvier [54], suggesting that  
324 mitochondria are associated with the axolemma there. Consistently, we found nodal  
325 mitochondria to be more metabolically active than internodal ones. However, our data  
326 following stimulations were recorded on mitochondria independently of their location on  
327 axons. As the node is much smaller than the internodes (1  $\mu\text{m}$  versus 600  $\mu\text{m}$  in average in the  
328 mouse nerve) the probability we recorded nodal mitochondria is extremely small. So the  
329 molecular mechanism that mobilizes mitochondria after AP firing has to exist also in  
330 internodal mitochondria.

331

332 Looking at the known origin of ROS in mitochondria, our data suggest that the  $\text{H}_2\text{O}_2$   
333 production we detected in axonal mitochondria reflects the loading of the mitochondrial  
334 matrix with protons before the production of ATP. However, since the  $\text{H}_2\text{O}_2$  production drops  
335 very quickly and, contrary to the ATP production, it is not cumulative, a more complex  
336 scheme has to be taken in consideration. Indeed,  $\text{H}_2\text{O}_2$  is formed by SOD enzyme from  $\text{O}_2^{\bullet-}$ ,  
337 which directly results from the ETC. Moreover,  $\text{H}_2\text{O}_2$  is then changed in  $\text{H}_2\text{O}$  and  $\text{O}_2$  by  
338 several reducing enzymes, such as mitochondrial GPx, so actually the amount of  $\text{H}_2\text{O}_2$  we  
339 detected is the result of equilibrium between  $\text{O}_2^{\bullet-}$  production and SOD and reducing enzymes'  
340 activities. As these enzymes are highly expressed in mitochondria [55], they probably do not  
341 constitute a limiting factor and the  $\text{H}_2\text{O}_2$  levels we detected still reflect axonal mitochondria  
342 metabolic activation. However,  $\text{H}_2\text{O}_2$  levels drop quickly, probably because reducing enzymes  
343 are removing it quickly. In addition, these enzymes' activities change following fast post-  
344 translational modifications such as phosphorylation [56] or environmental changes [57].

345 While this may explain why H<sub>2</sub>O<sub>2</sub> levels are not incremental following several stimulations,  
346 further investigation will be needed to clarify underlying mechanisms.

347

348 Several CNS and PNS neuropathies are linked to mitochondrial dysfunctions in neurons  
349 [18,19,20]. Our data show that the electrical activity of neurons directly regulates the  
350 physiology and the respiration of axonal mitochondria. As axonal mitochondria are the most  
351 abundant among neuronal mitochondria, this suggests that axonal mitochondria dysfunctions  
352 may severely impact neuronal physiology and survival. We evaluated this hypothesis using a  
353 couple of peripheral neuropathy mouse model, such as a model of CMT2A disease expressing  
354 mutant MFN2<sup>R94Q</sup> [25]. While *in vitro* data had shown increased H<sub>2</sub>O<sub>2</sub> levels [58], but no  
355 change in ATP production [59] in neuronal mitochondria of these mice, *in vivo* we did not  
356 measure significant differences in these parameters between resting MFN2<sup>R94Q</sup> mice and  
357 control mice. A first explanation for this discrepancy is that cultured cells are living in an  
358 environment that is significantly different from the *in vivo* conditions. This is especially true  
359 in terms of metabolism [60]. Another explanation is that mitochondria physiology is altered,  
360 but this can only be seen when mitochondria are challenged. Environmental changes in  
361 culture may constitute this challenge, while more physiologically relevant challenges have to  
362 be found *in vivo*. Our electrical stimulations were physiologically meaningful challenges for  
363 axons and, similar to control mice, we observed ATP levels increasing in several axons of  
364 mutant mice, but not all, after a first nerve stimulation. However, while control mice  
365 mitochondria increased their ATP production further following a second stimulation, no  
366 increase was observed in mutant mice mitochondria. We have shown that Mitochondria  
367 Associated Membranes (MAM), which mediate interactions between the endoplasmic  
368 reticulum and mitochondria [41], are impaired in these mutant mice. So we suggest that an  
369 impaired Ca<sup>2+</sup> uptake by mitochondria through MAM [61] could alter the ATP production as

370 it has been shown that calcium is required for the TCA cycle [62]. However, mutant mice  
371 mitochondria were still able to produce a large amount of H<sub>2</sub>O<sub>2</sub> following both stimulations,  
372 suggesting the ETC and therefore the TCA cycle are working properly. Yet this H<sub>2</sub>O<sub>2</sub>  
373 production was completely abnormal: it was largely delayed and was sustained for over at  
374 least 10 minutes. As discussed before the levels of H<sub>2</sub>O<sub>2</sub> result from an equilibrium between  
375 several parameters, so it is difficult to explain this abnormal production. Nevertheless, a  
376 relationship between mitochondrial shape and ROS has been shown *in vitro* [63]. It has been  
377 suggested that smaller mitochondria result in intra-mitochondrial redistribution of cytochrome  
378 c and the pro-aging molecule p66shc that acts through ROS upregulation [64,65]. Smaller  
379 fragmented mitochondria, such as MFN2 mutants [63], correlate with a malfunctioning  
380 antioxidant system and an increased production of ROS [58,64]. In any case, our data show  
381 that an altered MFN2 function lead to the dysfunction of axonal mitochondria only when  
382 axons are firing. This dysfunction is strongly deleterious as mitochondria don't produce more  
383 ATP but show a sustained production of deleterious ROS. This functional decoupling between  
384 ATP and H<sub>2</sub>O<sub>2</sub> production, occurring in the most abundant mitochondria of the neurons and in  
385 conditions of normal firing activity, is likely to be a significant cause of the neuronal  
386 dysfunction in this peripheral neuropathy.

387

388 Looking at the node of Ranvier of MFN2 mutant mice, we found that, similar to control mice,  
389 nodal mitochondria were more metabolically active than internodal ones. As MFN2 mutant  
390 mitochondria do not increase ATP production in active axons, this suggests that nodal  
391 mitochondria are intrinsically more active even in absence of firing. This is consistent with  
392 the fact that motile mitochondria slow down in the nodes of Ranvier [6] and that they have a  
393 different morphology [66]. Moreover, nodal mitochondria may participate to axonal  
394 degeneration since this process starts in nodes of Ranvier due to high ROS levels [67]. It

395 would have been interesting to investigate changes occurring in ATP and H<sub>2</sub>O<sub>2</sub> production of  
396 nodal mitochondria after electrical stimulation but this was impossible due to the small size of  
397 the node and the change of focus that occurs following stimulations.

398

399 The myelin sheath that covers axons appears to be an important regulator of axonal  
400 metabolism and of mitochondria physiology. Indeed in MS, demyelination alters axonal  
401 mitochondria [19,29,68] and we show here that nodes of Ranvier devoid of myelin house  
402 more metabolically active mitochondria. To go further, we therefore investigated the impact  
403 of the loss of myelin on axonal mitochondria. LPC was the right tool because it induced  
404 demyelination without destroying axons [46,47,48]. LPC-induced demyelination resulted in a  
405 decrease of ATP levels in axonal mitochondria. This decrease was strongest after two weeks  
406 and was reversed by 3 weeks, showing that ATP production within neurons is impaired until  
407 complete remyelination. This decrease was unexpected, since AP propagation in  
408 demyelinated axons is more energy demanding: the nodal machinery and the Na<sup>+</sup>/K<sup>+</sup> ATPase  
409 are diffused all along the axolemma and all the energy-effective benefits of myelination are  
410 lost [69]. In demyelinated area of brains affected by MS, an upregulation of ETC complexes  
411 protein expression and more complexes I and IV activity [68] was observed. Moreover,  
412 demyelinated axons showed more mitochondria [29], which is consistent with a higher energy  
413 demand.

414

415 Nevertheless, H<sub>2</sub>O<sub>2</sub> levels strongly increased in axonal mitochondria of fully demyelinated  
416 axons in absence of general oxidative stress in the tissue. This decoupling of mitochondrial  
417 oxidative phosphorylation and ATP production is in accordance with previous studies that  
418 reported a decreased ATP production, together with increased ROS levels in demyelinating  
419 diseases [70]. This suggests that actually, mitochondrial ETC complexes are more active and

420 produce more ROS, but this does not lead to more ATP production. Such a mechanism has  
421 been shown in particular conditions where the goal of mitochondrial activity is to produce  
422 heat. Uncoupling proteins such as UCP2 permeabilize the inner mitochondrial membrane to  
423 dissipate the proton gradient [71]. This may not be the sole utility of uncoupling as this  
424 process has been shown to occur in several neurodegenerative diseases [72]. However, so far  
425 we failed to detect unusual UCP2 expression in demyelinated nerves. The high production of  
426 H<sub>2</sub>O<sub>2</sub> during demyelination is probably not without consequences as ROS can alter the  
427 function of the ATP synthase [73]. This may explain why ATP production remains weak in  
428 mitochondria of axons that are being remyelinated two weeks after LPC injection, despite that  
429 ROS production is back to normal. This suggests that during demyelination, axons may  
430 recruit more mitochondria [29], or use another metabolism, such as aerobic glycolysis, in  
431 order to cover their need in ATP.

432

433 While very little amount of data exists on the homeostasis of axonal mitochondria in  
434 demyelinated axons of the PNS, in the CNS, demyelination in progressive MS results in  
435 axonal mitochondria dysfunction and ROS increase [74]. The data we collected in PNS  
436 myelinated axons on ROS production by axonal mitochondria are consistent with this. This  
437 suggests that, despite the large difference that exists between PNS and CNS myelinating glia,  
438 their similar role in segregating axonal firing machinery at nodes of Ranvier is essential for  
439 mitochondria homeostasis in axons. Nevertheless, the electrical isolation of the axon and the  
440 formation of the node of Ranvier is not the only function of the myelin sheath as it also  
441 largely participates to the metabolic homeostasis of the axon through the lactate shuttle  
442 process [75,76]. This is particularly true for the CNS myelin [76]. In addition, MS disease is  
443 significantly different from peripheral nerve diseases, in particular because of the important  
444 role played by CNS glial cells astrocytes and microglia. So, it would be essential to confirm



445 the data we obtained in PNS myelinated axons in CNS myelinated axons *in vivo*, in order to  
446 definitely conclude on the alteration of ATP and ROS production by axonal mitochondria in  
447 demyelinated lesion of progressive MS.

448

449 To conclude, combining several novel techniques such as two-photon and CARS non-linear  
450 live imaging coupled to electrical nerve stimulation and genetically-encoded fluorescent  
451 probes delivered by AAV vectors, we were able to observe the production of ATP and H<sub>2</sub>O<sub>2</sub>  
452 by axonal mitochondria in real time and in living and active axons of mouse peripheral  
453 nerves. We demonstrated that mitochondria are more metabolically active at the node of  
454 Ranvier and we characterized the role of AP firing in the dynamics of mitochondrial ATP and  
455 H<sub>2</sub>O<sub>2</sub> production. Moreover we show the deleterious alterations that occur in axonal  
456 mitochondria physiology of two mouse models of neuropathy, peripheral axonal CMT2A and  
457 demyelinating peripheral neuropathies. Together, our data thus provide new insight into the  
458 role of axonal mitochondria under physiological and pathological conditions.

459

#### 460 **4. Materials and methods**

461

##### 462 *4.1. Cloning*

463

464 pLPCX mito-roGFP-Orp1 (Addgene; #64992) was digested with XhoI/ClaI, blunted and  
465 cloned into pAAV-MCS (Cell Biolabs, Inc.) under the control of a CMV promoter. Clones  
466 were validated by sequencing. Likewise, pcDNA-mito-AT1.03 (from H. Imamura, Tokyo,  
467 Japan) was digested with XhoI/HindIII, blunted and cloned into the CMV promoter controlled  
468 pAAV-MCS. Mitochondria-targeting tags were CoxVIII for roGFP-Orp1 and two tandem  
469 copies of CoxVIII for mito-AT1.03. AAV viral particles were produced at the viral vector

470 production centre at the Centre de Biotecnologia Animal i Teràpia Gènica in Barcelona, Spain  
471 or the University of Nantes, France.

472

#### 473 *4.2. Mouse strains*

474

475 Either Swiss mice (Janvier, France) or MFN2<sup>R94Q</sup> mice [25] were used in the performed  
476 experiments. Mice were kept in the animal facility of the Institute for Neurosciences of  
477 Montpellier in clear plastic boxes and subjected to standard light cycles. All animal  
478 experiments were conducted in accordance with the French Institutional and National  
479 Regulation CEEA-LR-11032.

480

#### 481 *4.3. In vivo virus injection in spinal cord*

482

483 A thin borosilicate glass capillary (Harvard Apparatus, Ref. 30-0016) was pulled with a  
484 Vertical Micropipette Puller (Sutter Instruments, P30-682) to form a glass needle. The glass  
485 needle was filled with viral solution (1 µl) and a 1 day old mouse is restrained in a position  
486 that exposes the lower back. The needle is injected through the skin using a micromanipulator  
487 and introduced into the spinal cord. The viral solution was injected over 2 minutes with short  
488 pressure pulses using a Picopump (World Precision Instrument) coupled to a pulse generator.  
489 After injection, the injection site is cleaned with betadine solution (Vetoquinol, cat. no.  
490 3042413) for disinfection and the pup is placed back with its mother and littermates.

491

#### 492 *4.4. Immunohistochemistry*

493

494 One month after the viral injection, the sciatic nerve was dissected and fixed in Zamboni's  
495 fixative [77] for 10 min at room temperature. After fixation, the dissected sciatic nerves are  
496 washed in PBS and incubated in successive glycerol baths (15, 45, 60, 66% in PBS) for 18 to  
497 24 h each before freezing at  $-20^{\circ}\text{C}$ . The nerves were cut in small pieces in 66% glycerol and  
498 the epineurium sheaths removed. Small bundles of fibers were teased in double-distilled water  
499 on Superfrost slides and dried for 3 hours at room temperature. Some nerves were frozen in  
500 O.C.T. Compound (Tissue-Tek, Ref. 4583) and longitudinal sections were cut using a cryostat  
501 (Leica Biosystems, CM3050). For immunostaining, the teased fibers or longitudinal sections  
502 were incubated for 1 h at room temperature in blocking solution (10% goat serum and 0.3%  
503 TritonX100 in PBS). Then, the samples were incubated with TOM20 (FL-145) primary rabbit  
504 antibody (1/500, Santa Cruz, Ref. sc-11415), mouse anti-Myelin Basic Protein (1/500, Merck,  
505 Ref. NE1019) or rabbit NF-200 (1/500, Sigma, Ref. N4142) in blocking solution overnight at  
506  $4^{\circ}\text{C}$ . The next day, the samples were washed in PBS and incubated for 1h at room  
507 temperature with secondary donkey antibodies coupled to Alexa568 (1/1000, Invitrogen, Ref.  
508 A10042) or Alexa488 (1/1000, Invitrogen, Ref. A21202). Finally the samples were washed in  
509 PBS and mounted in Immu-mount (Thermo Scientific). Images were acquired at room  
510 temperature using a 20 $\times$  or 40 $\times$  objective, a Zeiss confocal microscope LSM710, and its  
511 associated software.

512

#### 513 *4.5. Imaging of sciatic nerve in living mice*

514

515 One month after the viral injection, the mice were anesthetized with a constant flow (1.5  
516 l/min) of oxygen + 5% of isoflurane in an anesthesia box (World Precision Instruments, Ref.  
517 EZ-B800) for 5 min. Thereafter the anesthesia was maintained with a mask delivering 2%  
518 isoflurane at 0.8 l/min. The eyes were protected by eye protection gel (Ocry-gel, TVM, cat.

519 no. 48026T613/3). Intraperitoneal injection of 0.1 mg/kg buprenorphine was used for pre-  
520 surgery analgesia. The mouse was placed in a silicone mold, lying on its belly, shaved on his  
521 hind paw and the paws immobilized using small pins. The incision area was disinfected with  
522 betadine solution (Vetoquinol, cat. no. 3042413). The skin was cut using scissors, fat tissue  
523 removed, the gluteus superficialis and biceps femoris muscles were separated to reveal a  
524 cavity crossed by the sciatic nerve, and the sciatic nerve was lifted up using a small spatula. A  
525 long plastic strip was placed underneath the sciatic nerve and this strip fixed using magnets.  
526 The sciatic nerve was kept in an aqueous environment of either sterile PBS buffer or artificial  
527 cerebrospinal fluid (148 mM NaCl, 3 mM KCl, 1.4 mM CaCl<sub>2</sub>•2H<sub>2</sub>O, 0.8 mM MgCl<sub>2</sub>•6H<sub>2</sub>O,  
528 0.2 mM NaPO<sub>4</sub>•H<sub>2</sub>O in sterile H<sub>2</sub>O) to prevent drying. At that point the mouse was placed  
529 under the two-photon microscope objective lens, a glass, 12mm diameter, 0.25mm thick  
530 microscope coverslip put on top of the nerve and a drop of deionized water placed on it to  
531 immerse the objective lens (20X, Carl Zeiss Microscopy, LD CApochromat, Ref. 421887–  
532 9970).

533

#### 534 *4.6. Demyelination procedure*

535

536 After imaging of the sciatic nerve in vivo for at least 30 minutes, 5 µl of 1 mg/ml  
537 lysophosphatidyl choline (LPC) was injected directly into the sciatic nerve using a Hamilton  
538 syringe (Ref. 80930) to induce demyelination. Injection of 5 µl PBS is used as a negative  
539 control. After injection, the nerve was placed back to its original location in the body. The  
540 skin of the incision was realigned together using a blunt scalpel and stapled along the wound  
541 with two clips (Fine Science Tools; 12020-00). The area around the wound was disinfected  
542 again with betadine solution. The anesthesia mask was removed and the mouse was  
543 monitored until it had woken up. Motor function of the injected and non-injected hindlimb

544 was followed by lifting the animal by the tail. At 1 week after LPC injection, the non-injected  
545 hindlimb showed a normal postural reflex characterized by spreading of leg whereas the  
546 injected hindlimb showed abnormal reflexes such as tremors, claspings or retracting of the  
547 paw. This behavior has been described and linked to deficient myelination in the PNS in  
548 previous studies [78]. The severity of abnormal hindlimb function decreased at 2 weeks after  
549 LPC injection and no difference in leg function between the injected and non-injected  
550 hindlimb could be observed anymore at 3 weeks after LPC injection.

551

#### 552 *4.7. Saphenous nerve stimulation in living mice*

553

554 After skin incision and removal of connecting tissue, the saphenous nerve is lifted up and  
555 isolated using a plastic strip (Fig 2a). To stimulate the saphenous nerve, two platinum kapton  
556 microelectrodes (World Precision Instruments, PTM23B05KT) were inserted at the posterior  
557 side of the plastic strip using a micromanipulator (Fig 2A). One hook-shaped recording  
558 electrode (AD Instruments, MLA 1203) was placed at the anterior side (Fig 2A). The ground  
559 electrode was inserted in the tail of the mouse and the negative electrode in the groin area (Fig  
560 2B). The mouse was placed under the two-photon microscope (Fig 2C), a microscope glass  
561 coverslip was placed on top of the nerve and the electrodes were connected to a Powerlab 26T  
562 (AD Instruments; ML4856). A drop of deionized water was then placed on top of the  
563 microscope glass to immerse the 20× objective lens.

564

#### 565 *4.8. Two-photon image acquisition*

566

567 All in vivo images were obtained with a two-photon microscope LSM 7 MP OPO (Zeiss,  
568 France) coupled to a dark microscope incubator (L S1 Dark, Zeiss) in which the temperature

569 was maintained at 37 °C (Heating Unit XL S, Zeiss, France). Mitochondria images were  
570 acquired by time-lapse recording varying from one image every minute to one image every 5  
571 minutes during 1 hour. Each image is a stack at Maximum Intensity (ZEN software, Zeiss) of  
572 10 scans over 40 µm depth. For AT1.03 imaging, a single track at 850 nm excitation  
573 wavelength is used to obtain both the CFP (em. 475 nm) and YFP (em. 527 nm) image at the  
574 same time point. For roGFP imaging, the two images were acquired for each time point using  
575 alternating tracks at 940nm and 800nm. Change of track was set after each stack. For  
576 Coherent Anti-Stokes Raman Scattering (CARS) imaging, 2 synchronized laser lines at  
577 excitation wavelengths 836 nm and 1097 nm are used simultaneously thanks to the OPO  
578 system. Each scan was acquired with constant laser intensity (20% for 940 nm, 10% for 850  
579 nm, 10% for 800nm, 15% for 836nm, 4% 1097nm) at a 512 × 512 pixel resolution and  
580 microscope imaging parameters were maintained over all different regions we imaged.  
581 Images, acquired with ZEN software (Zeiss), were saved in .dzi format.

582

#### 583 *4.9. Data and statistical analysis*

584

585 We used ImageJ software to analyze the relative ATP or H<sub>2</sub>O<sub>2</sub> levels in mitochondria of  
586 peripheral axons. The acquired images for each wavelength were aligned using the Template  
587 Matching plugin. We defined a Region of Interest (ROI) encompassing all labeled  
588 mitochondria of the same axon and the mean fluorescent intensity on the ROI was measured  
589 on both images. These light intensities were then corrected for background light intensity  
590 determined as an area within the nerve where no fluorescent signal from the viral probe can  
591 be observed. Either the AT1.03 YFP/CFP ratio or the oxidized roGFP/reduced roGFP ratio  
592 was then calculated from the 2 values for mean light intensity.

593

594 Statistical significance for the effect of time on probe stability was determined using linear  
595 regression. The effects of the positive controls and negative controls on probe validation were  
596 determined using Student two-tailed T-tests. The effect of nerve stimulation was determined  
597 using one-way ANOVA and Dunnett's post-hoc tests. In addition, the threshold for a  
598 responding axon was set at 20% change in probe fluorescence ratio. The differences between  
599 MFN2 mutants and wild-type mice were determined using either Student two-tailed T-tests or  
600 two- way ANOVA with Sidak post-hoc tests. Differences between internodes and node of  
601 Ranvier mitochondria were determined using paired two-tailed T-tests. The effect of  
602 demyelination was determined using paired two-tailed T-tests.

603

#### 604 *4.10. Data and statistical analysis*

605

606 The data that support the findings of this study are available from the corresponding author  
607 upon reasonable request.

608

## 609 **5. Financial disclosure**

610

611 This work has benefited from support by an ERC consolidator grant to NT and by the Labex  
612 EpiGenMed ANR-10-LABX-12-01.

613

## 614 **6. Acknowledgements**

615

616 In addition we thank the MRI imaging platform, supported by the French National Research  
617 Agency (ANR-10-INBS-04), in particular Hassan Boukhaddaoui, and the Animal Facility of

618 the INM. We also would like to thank Patrice Quintana for his help with the nerve stimulation  
619 protocol and Volker Baeker for the image analysis protocol.

620

## 621 **7. Competing interests**

622

623 The authors declare that the research was conducted in the absence of any commercial or  
624 financial relationships that could be construed as a potential conflict of interest.

625

## 626 **8. References**

627

- 628 1. Harris JJ, Jolivet R, Attwell D. Synaptic Energy Use and Supply. *Neuron*. 2012 Sep 6;75(5):762–  
629 77.
- 630 2. Attwell D, Laughlin SB. An Energy Budget for Signaling in the Grey Matter of the Brain. *J Cereb*  
631 *Blood Flow Metab*. 2001 Oct 1;21(10):1133–45.
- 632 3. Ames A. CNS energy metabolism as related to function. *Brain Res Rev*. 2000 Nov 1;34(1):42–68.
- 633 4. Salzer JL, Zalc B. Myelination. *Curr Biol*. 2016 Oct 24;26(20):R971–5.
- 634 5. Fischer TD, Dash PK, Liu J, Waxham MN. Morphology of mitochondria in spatially restricted  
635 axons revealed by cryo-electron tomography. *PLOS Biol*. 2018 Sep 17;16(9):e2006169.
- 636 6. Misgeld T, Kerschensteiner M, Bareyre FM, Burgess RW, Lichtman JW. Imaging axonal transport  
637 of mitochondria in vivo. *Nat Methods*. 2007 Jun 10;4:559.
- 638 7. Zhou B, Yu P, Lin M-Y, Sun T, Chen Y, Sheng Z-H. Facilitation of axon regeneration by enhancing  
639 mitochondrial transport and rescuing energy deficits. *J Cell Biol*. 2016;214(1):103–119.
- 640 8. Ohno N, Kidd GJ, Mahad D, Kiryu-Seo S, Avishai A, Komuro H, et al. Myelination and axonal  
641 electrical activity modulate the distribution and motility of mitochondria at CNS nodes of  
642 Ranvier. *J Neurosci Off J Soc Neurosci*. 2011 May 18;31(20):7249–58.
- 643 9. Perkins GA, Ellisman MH. Mitochondrial Configurations in Peripheral Nerve Suggest Differential  
644 ATP Production. *J Struct Biol*. 2011 Jan;173(1):117–27.
- 645 10. Tarasov AI, Griffiths EJ, Rutter GA. Regulation of ATP production by mitochondrial Ca<sup>2+</sup>. *Cell*  
646 *Calcium*. 2012 Jul;52(1):28–35.
- 647 11. Edgar JM, McCulloch MC, Thomson CE, Griffiths IR. Distribution of mitochondria along small-  
648 diameter myelinated central nervous system axons. *J Neurosci Res*. 2008;86(10):2250–7.
- 649 12. Giorgio M, Trinei M, Migliaccio E, Pelicci PG. Hydrogen peroxide: a metabolic by-product or a  
650 common mediator of ageing signals? *Nat Rev Mol Cell Biol*. 2007 Sep 1;8:722.



- 651 13. Murphy MP. How mitochondria produce reactive oxygen species. *Biochem J.* 2009 Jan 1;417(Pt  
652 1):1–13.
- 653 14. Hamanaka RB, Chandel NS. Mitochondrial reactive oxygen species regulate cellular signaling  
654 and dictate biological outcomes. *Trends Biochem Sci.* 2010 Sep;35(9):505–13.
- 655 15. Tormos KV, Chandel NS. Seeing the Light: Probing ROS In Vivo Using Redox GFP. *Cell Metab.*  
656 2011 Dec 7;14(6):720–1.
- 657 16. Dixon BJ, Tang J, Zhang JH. The evolution of molecular hydrogen: a noteworthy potential  
658 therapy with clinical significance. *Med Gas Res.* 2013;3:10–10.
- 659 17. Tomanek L. Proteomic responses to environmentally induced oxidative stress. *J Exp Biol.*  
660 2015;218(12):1867–1879.
- 661 18. Dauer W, Przedborski S. Parkinson’s disease: mechanisms and models. *Neuron.* 39th ed.  
662 2003;889–909.
- 663 19. Su KG, Banker G, Bourdette D, Forte M. Axonal degeneration in multiple sclerosis: The  
664 mitochondrial hypothesis. *Curr Neurol Neurosci Rep.* 2009 Sep;9(5):411–7.
- 665 20. Palau F, Estela A, Pla-Martín D, Sánchez-Piris M. The Role of Mitochondrial Network Dynamics  
666 in the Pathogenesis of Charcot-Marie-Tooth Disease. In: Espinós C, Felipe V, Palau F, editors.  
667 Inherited Neuromuscular Diseases: Translation from Pathomechanisms to Therapies [Internet].  
668 Dordrecht: Springer Netherlands; 2009. p. 129–37.
- 669 21. Smith GM, Gallo G. The role of mitochondria in axon development and regeneration. *Dev*  
670 *Neurobiol.* 2017 Oct 14;78(3):221–37.
- 671 22. Chen H, Chan DC. Emerging functions of mammalian mitochondrial fusion and fission. *Hum Mol*  
672 *Genet.* 2005 Oct 15;14(suppl\_2):R283–9.
- 673 23. Misko A, Jiang S, Wegorzewska I, Milbrandt J, Baloh RH. Mitofusin 2 is necessary for transport  
674 of axonal mitochondria and interacts with the Miro/Milton complex. *J Neurosci Off J Soc*  
675 *Neurosci.* 2010 Mar 24;30(12):4232–40.
- 676 24. Züchner S, Mersiyanova IV, Muglia M, Bissar-Tadmouri N, Rochelle J, Dadali EL, et al. Mutations  
677 in the mitochondrial GTPase mitofusin 2 cause Charcot-Marie-Tooth neuropathy type 2A. *Nat*  
678 *Genet.* 2004 Apr 4;36:449.
- 679 25. Cartoni R, Arnaud E, Médard J-J, Poirot O, Courvoisier DS, Chrast R, et al. Expression of  
680 mitofusin 2R94Q in a transgenic mouse leads to Charcot-Marie-Tooth neuropathy type 2A.  
681 *Brain.* 2010 May 1;133(5):1460–9.
- 682 26. Pich S, Bach D, Briones P, Liesa M, Camps M, Testar X, et al. The Charcot-Marie-Tooth type 2A  
683 gene product, Mfn2, up-regulates fuel oxidation through expression of OXPHOS system. *Hum*  
684 *Mol Genet.* 2005 Jun 1;14(11):1405–15.
- 685 27. Frohman EM, Racke MK, Raine CS. Multiple Sclerosis — The Plaque and Its Pathogenesis. *N Engl*  
686 *J Med.* 2006 Mar 2;354(9):942–55.

- 687 28. Sedel F, Bernard D, Mock DM, Tourbah A. Targeting demyelination and virtual hypoxia with  
688 high-dose biotin as a treatment for progressive multiple sclerosis. *Oligodendrocytes Health Dis.*  
689 2016 Nov 1;110:644–53.
- 690 29. Mahad DJ, Ziabreva I, Campbell G, Lax N, White K, Hanson PS, et al. Mitochondrial changes  
691 within axons in multiple sclerosis. *Brain J Neurol.* 2009 May;132(Pt 5):1161–74.
- 692 30. Campbell G, Mahad DJ. Mitochondrial dysfunction and axon degeneration in progressive  
693 multiple sclerosis. *FEBS Lett.* 2018 Feb 17;592(7):1113–21.
- 694 31. Gutscher M, Sobotta MC, Wabnitz GH, Ballikaya S, Meyer AJ, Samstag Y, et al. Proximity-based  
695 Protein Thiol Oxidation by H<sub>2</sub>O<sub>2</sub>-scavenging Peroxidases. *J Biol Chem.* 2009 Nov  
696 13;284(46):31532–40.
- 697 32. Imamura H, Huynh Nhat KP, Togawa H, Saito K, Iino R, Kato-Yamada Y, et al. Visualization of  
698 ATP levels inside single living cells with fluorescence resonance energy transfer-based  
699 genetically encoded indicators. *Proc Natl Acad Sci U S A.* 2009 Sep 15;106(37):15651–6.
- 700 33. Albrecht SC, Barata AG, Großhans J, Teleman AA, Dick TP. In Vivo Mapping of Hydrogen  
701 Peroxide and Oxidized Glutathione Reveals Chemical and Regional Specificity of Redox  
702 Homeostasis. *Cell Metab.* 2011 Dec 7;14(6):819–29.
- 703 34. Ren W, Ai H-W. Genetically Encoded Fluorescent Redox Probes. *Sensors.* 13th ed. 2013;15422–  
704 33.
- 705 35. Tu H, Boppart SA. Coherent anti-Stokes Raman scattering microscopy: overcoming technical  
706 barriers for clinical translation. *J Biophotonics.* 2014 Jan;7(0):9–22.
- 707 36. Mytskaniuk V, Bardin F, Boukhaddaoui H, Rigneault H, Tricaud N. Implementation of a Coherent  
708 Anti-Stokes Raman Scattering (CARS) System on a Ti:Sapphire and OPO Laser Based Standard  
709 Laser Scanning Microscope. *J Vis Exp.* 113th ed. 2016;doi: 10.3791/54262.
- 710 37. Hajjar H, Boukhaddaoui H, Rizgui A, Sar C, Berthelot J, Perrin-Tricaud C, et al. Label-free non-  
711 linear microscopy to measure myelin outcome in a rodent model of Charcot-Marie-Tooth  
712 diseases. *J Biophotonics.* 2018 Aug 9;0(ja):e201800186.
- 713 38. Huff TB, Cheng J-X. In vivo coherent anti-Stokes Raman scattering imaging of sciatic nerve  
714 tissue. *J Microsc.* 2007 Feb;225(Pt 2):175–82.
- 715 39. Gonzalez S, Fernando R, Berthelot J, Perrin-Tricaud C, Sarzi E, Chrast R, et al. In vivo time-lapse  
716 imaging of mitochondria in healthy and diseased peripheral myelin sheath. *Mitochondrion.*  
717 2015 Jul 1;23:32–41.
- 718 40. Ino D, Sagara H, Suzuki J, Kanemaru K, Okubo Y, Iino M. Neuronal Regulation of Schwann Cell  
719 Mitochondrial Ca<sup>2+</sup> Signaling during Myelination. *Cell Rep.* 2015 Sep 29;12(12):1951–9.
- 720 41. Bernard-Marissal N, Van Hameren G, Juneja M, Pellegrino C, Rochat C, El Mansour O, et al.  
721 Endoplasmic reticulum and mitochondria dysfunction underlies reversible Charcot-Marie-  
722 Tooth type 2A neuropathy. (Under Review). under review;
- 723 42. Bazil JN, Beard DA, Vinnakota KC. Catalytic Coupling of Oxidative Phosphorylation, ATP  
724 Demand, and Reactive Oxygen Species Generation. *Biophys J.* 2016 Feb 23;110(4):962–71.

- 725 43. Cadenas E, Davies KJA. Mitochondrial free radical generation, oxidative stress, and aging. *Free*  
726 *Radic Biol Med.* 2000 Aug 1;29(3):222–30.
- 727 44. Bélanger E, Henry FP, Vallée R, Randolph MA, Kochevar IE, Winograd JM, et al. In vivo  
728 evaluation of demyelination and remyelination in a nerve crush injury model. *Biomed Opt*  
729 *Express.* 2011 Sep;2(9):2698–2708.
- 730 45. Cooper MF, Webster GR. The differentiation of phospholipase A1 and A2 in rat and human  
731 nervous tissues. *J Neurochem.* 1970 Nov;17(11):1543–54.
- 732 46. Allt G, Ghabriel MN, Sikri K. Lysophosphatidyl choline-induced demyelination. *Acta Neuropathol*  
733 *(Berl).* 1988 Sep 1;75(5):456–64.
- 734 47. Plemel JR, Michaels NJ, Weishaupt N, Caprariello AV, Keough MB, Rogers JA, et al. Mechanisms  
735 of lysophosphatidylcholine-induced demyelination: A primary lipid disrupting myelinopathy.  
736 *Glia.* 2017 Oct 25;66(2):327–47.
- 737 48. Kiryu-Seo S, Ohno N, Kidd GJ, Komuro H, Trapp BD. Demyelination increases axonal stationary  
738 mitochondrial size and the speed of axonal mitochondrial transport. *J Neurosci Off J Soc*  
739 *Neurosci.* 2010 May 12;30(19):6658–66.
- 740 49. Tricaud N, Park H. Wallerian demyelination: chronicle of a cellular cataclysm. *Cell Mol Life Sci.*  
741 74th ed. 2017;4049–57.
- 742 50. Meiri H, Steinberg R, Medalion B. Detection of Sodium Channel Distribution in Rat Sciatic Nerve  
743 Following Lysophosphatidylcholine-Induced Demyelination. *J Membrane Biol.* 92nd ed.  
744 1986;47–56.
- 745 51. Hanson GT, Aggeler R, Oglesbee D, Cannon M, Capaldi RA, Tsien RY, et al. Investigating  
746 Mitochondrial Redox Potential with Redox-sensitive Green Fluorescent Protein Indicators. *J Biol*  
747 *Chem.* 2004 Mar 26;279(13):13044–53.
- 748 52. Dooley CT, Dore TM, Hanson GT, Jackson WC, Remington SJ, Tsien RY. Imaging Dynamic Redox  
749 Changes in Mammalian Cells with Green Fluorescent Protein Indicators. *J Biol Chem.* 2004 May  
750 21;279(21):22284–93.
- 751 53. Samara C, Poirot O, Domènech-Estévez E, Chrast R. Neuronal activity in the hub of  
752 extrasynaptic Schwann cell-axon interactions. *Front Cell Neurosci.* 2013;7:228.
- 753 54. Yi M, Weaver D, Hajnóczky G. Control of mitochondrial motility and distribution by the calcium  
754 signal: a homeostatic circuit. *J Cell Biol.* 2004 Nov 22;167(4):661–72.
- 755 55. Fukai T, Ushio-Fukai M. Superoxide Dismutases: Role in Redox Signaling, Vascular Function, and  
756 Diseases. *Antioxid Redox Signal.* 2011 Sep 15;15(6):1583–606.
- 757 56. Yamakura F, Kawasaki H. Post-translational modifications of superoxide dismutase. *Biochim*  
758 *Biophys Acta.* 1804th ed. 2010;318–25.
- 759 57. Little C, Olinescu R, Reid KG, O'Brien PJ. Properties and Regulation of Glutathione Peroxidase. *J*  
760 *Biol Chem.* 1970 Jul 25;245(14):3632–6.

- 761 58. Nie Q, Wang C, Song G, Ma H, Kong D, Zhang X, et al. Mitofusin 2 deficiency leads to oxidative  
762 stress that contributes to insulin resistance in rat skeletal muscle cells. *Mol Biol Rep.* 2014 Oct  
763 1;41(10):6975–83.
- 764 59. Baloh RH, Schmidt RE, Pestronk A, Milbrandt J. Altered Axonal Mitochondrial Transport in the  
765 Pathogenesis of Charcot-Marie-Tooth Disease from Mitofusin 2 Mutations. *J Neurosci.*  
766 2007;27(2):422–430.
- 767 60. Zilberter Y, Zilberter T, Bregestovski P. Neuronal activity in vitro and the in vivo reality: the role  
768 of energy homeostasis. *Trends Pharmacol Sci.* 2010 Sep 1;31(9):394–401.
- 769 61. Ainbinder A, Boncompagni S, Protasi F, Dirksen RT. Role of Mitofusin-2 in Mitochondrial  
770 Localization and Calcium Uptake in Skeletal Muscle. *Cell Calcium.* 2015 Jan;57(1):14–24.
- 771 62. Chen Y, Csordás G, Jowdy C, Schneider TG, Csordás N, Wang W, et al. Mitofusin 2-containing  
772 Mitochondrial-Reticular Microdomains Direct Rapid Cardiomyocyte Bioenergetic Responses via  
773 Inter-Organellar Ca<sup>2+</sup> Crosstalk. *Circ Res.* 2012 Sep 14;111(7):863–75.
- 774 63. Yu T, Robotham JL, Yoon Y. Increased production of reactive oxygen species in hyperglycemic  
775 conditions requires dynamic change of mitochondrial morphology. *Proc Natl Acad Sci U S A.*  
776 2006 Feb 21;103(8):2653–8.
- 777 64. de Brito OM, Scorrano L. Mitofusin 2: A Mitochondria-Shaping Protein with Signaling Roles  
778 Beyond Fusion. *Antioxid Redox Signal.* 2007 Dec 20;10(3):621–34.
- 779 65. Giorgio M, Migliaccio E, Orsini F, Paolucci D, Moroni M, Contursi C, et al. Electron Transfer  
780 between Cytochrome c and p66Shc Generates Reactive Oxygen Species that Trigger  
781 Mitochondrial Apoptosis. *Cell.* 2005 Jul 29;122(2):221–33.
- 782 66. Chen H, Chan DC. Mitochondrial dynamics—fusion, fission, movement, and mitophagy—in  
783 neurodegenerative diseases. *Hum Mol Genet.* 2009 Oct 15;18(R2):R169–76.
- 784 67. Bros H, Millward JM, Paul F, Niesner R, Infante-Duarte C. Oxidative damage to mitochondria at  
785 the nodes of Ranvier precedes axon degeneration in ex vivo transected axons. *Exp Neurol.* 2014  
786 Nov 1;261:127–35.
- 787 68. Witte ME, Bø L, Rodenburg RJ, Belien JA, Musters R, Hazes T, et al. Enhanced number and  
788 activity of mitochondria in multiple sclerosis lesions. *J Pathol.* 2009 May 26;219(2):193–204.
- 789 69. Young EA, Fowler CD, Kidd GJ, Chang A, Rudick R, Fisher E, et al. Imaging correlates of  
790 decreased axonal Na<sup>+</sup>/K<sup>+</sup> ATPase in chronic multiple sclerosis lesions. *Ann Neurol.*  
791 2008;63(4):428–35.
- 792 70. Gilgun-Sherki Y, Melamed E, Offen D. The role of oxidative stress in the pathogenesis of multiple  
793 sclerosis: The need for effective antioxidant therapy. *J Neurol.* 2004 Mar 1;251(3):261–8.
- 794 71. Rousset S, Alves-Guerra M-C, Mozo J, Miroux B, Cassard-Doulcier A-M, Bouillaud F, et al. The  
795 Biology of Mitochondrial Uncoupling Proteins. *Diabetes.* 2004;53(suppl 1):S130–S135.
- 796 72. Dalgaard LT, Pedersen O. Uncoupling proteins: functional characteristics and role in the  
797 pathogenesis of obesity and Type II diabetes. *Diabetologia.* 2001 Aug 1;44(8):946–65.

- 798 73. Rexroth S, Poetsch A, Rögner M, Hamann A, Werner A, Osiewacz HD, et al. Reactive oxygen  
799 species target specific tryptophan site in the mitochondrial ATP synthase. *Biochim Biophys Acta*  
800 *BBA - Bioenerg.* 2012 Feb 1;1817(2):381–7.
- 801 74. Yin X, Kidd GJ, Ohno N, Perkins GA, Ellisman MH, Bastian C, et al. Proteolipid protein–deficient  
802 myelin promotes axonal mitochondrial dysfunction via altered metabolic coupling. *J Cell Biol.*  
803 2016 Nov 21;215(4):531–42.
- 804 75. Yellen G. Fueling thought: Management of glycolysis and oxidative phosphorylation in neuronal  
805 metabolism. *J Cell Biol.* 2018;217(7):2235–2246.
- 806 76. Funfschilling U, Supplie LM, Mahad D, Boretius S, Saab AS, Edgar J, et al. Glycolytic  
807 oligodendrocytes maintain myelin and long-term axonal integrity. *Nature.* 2012 Apr  
808 29;485(7399):517–21.
- 809 77. Stefanini M, Martino CD, Zamboni L. Fixation of Ejaculated Spermatozoa for Electron  
810 Microscopy. *Nature.* 1967 Oct 14;216:173.
- 811 78. Hung H, Kohnken R, Svaren J. The NURD chromatin remodeling complex is required for  
812 peripheral nerve myelination. *J Neurosci.* 2012 Feb 1;32(5):1517–27.
